# Supplementary figures and images for: Photoperiod induced the pituitary differential regulation of lncRNAs and mRNAs related to reproduction in sheep
Source: PeerJ journal article supplement (doi:10.7717/peerj.10953), 2021-04-21

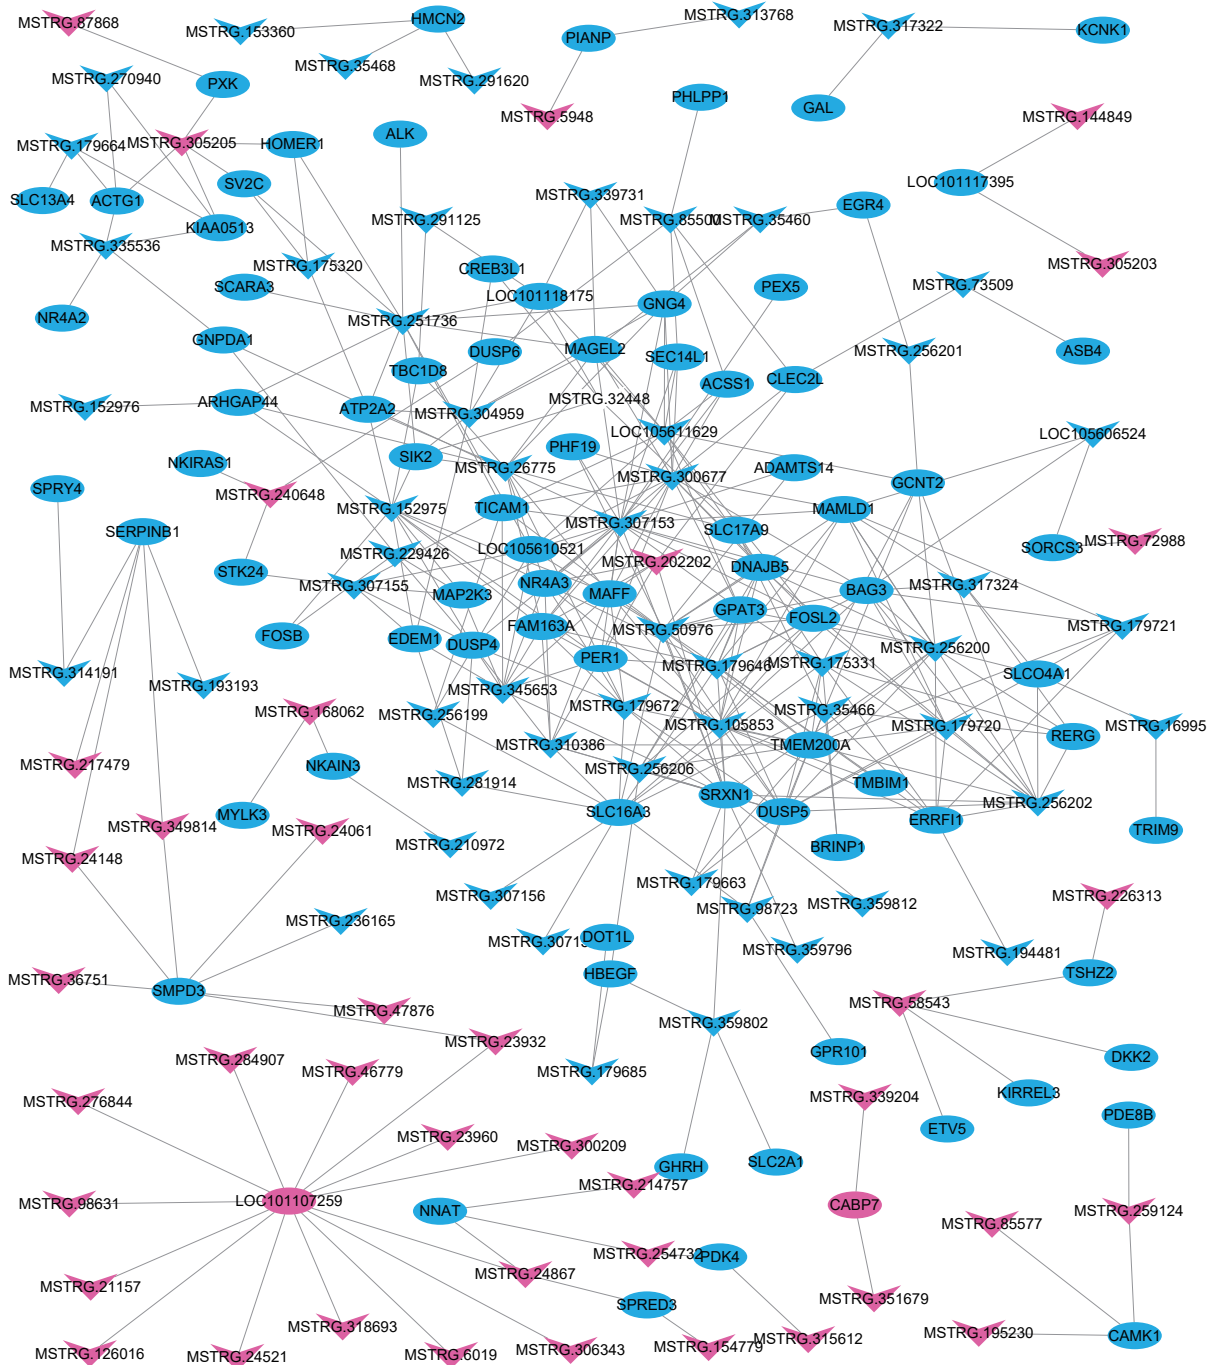

Supplement: Supplementary_materials.zip [file Supplementary_materials.zip]
